# Supplementary material
Source: publisher figshare collection journal article supplement (https://rs.figshare.com/ndownloader/files/15288134)
Supplement: Supplementary file 1 [file 15288134]

## Sheet: Sheet1
Density (D)	Detection	Movement		logL	K	AIC	dAIC	weight	CumWt
~site + season	~site + year + day + day2 + site * season	~site + year + site * season		3828	19	7694	0	0.36	0.36
~site + season	~site + year + day + day2	~site + year + site * season		3830	17	7695	0.54	0.28	0.64
~site	~site + year + day + day2 + site * season	~site + year + site * season		3830	18	7697	2.51	0.1	0.74
~session	~site + year + day + day2	~site + year + site * season		3830	19	7697	2.62	0.098	0.84
~site	~site + year + day + day2	~site + year + site * season		3833	16	7698	3.37	0.067	0.91
~session	~site + year + day + day2 + site * season	~site + year + site * season		3828	21	7699	4.31	0.042	0.95
~site + season	~ day + year + site + year:site	~site + year + site * season		3833	18	7701	6.83	0.012	0.96
~session	~site + year + day + day2	~site + year		3834	17	7701	6.97	0.011	0.97
~session	~ day + year + site + year:site	~site + year + site * season		3832	20	7703	8.73	0.0046	0.98
~season	~site + year + day + day2 + site * season	~site + year + site * season		3835	17	7703	8.9	0.0042	0.98
~site + season	~ day + year + site	~site + year + site * season		3836	16	7703	8.94	0.0042	0.99
~site	~ day + year + site + year:site	~site + year + site * season		3835	17	7704	9.5	0.0031	0.99
~session	~ day + year + site	~site + year + site * season		3834	18	7705	10.26	0.0021	0.99
~season	~site + year + day + day2	~site + year + site * season		3837	15	7705	10.28	0.0021	0.99
~session	~site + year + day + day2 + site * season	~site + year		3834	19	7706	11.27	0.0013	0.99
~site	~ day + year + site	~site + year + site * season		3838	15	7706	11.93	0.00093	1
~session	~site + year + day + day2	~site		3837	16	7707	12.18	0.00082	1
~1	~site + year + day + day2 + site * season	~site + year + site * season		3837	16	7707	12.22	0.00081	1
~1	~site + year + day + day2	~site + year + site * season		3840	14	7707	12.67	0.00064	1
~site + season	~site + year + day + day2 + site * season	~site + year		3837	17	7707	12.74	0.00062	1
~session	~site + year + day + day2	~year		3839	15	7709	14.56	0.00025	1
~site + season	~site + day + day2	~site + year + site * season		3838	16	7709	14.56	0.00025	1
~session	~ day + year + site	~site + year		3839	16	7710	15.33	0.00017	1
~session	~site + day + day2	~site + year + site * season		3837	18	7710	15.48	0.00016	1
~session	~site + year + day + day2	~1		3841	14	7710	16.07	0.00012	1
~session	~site + year + day + day2 + site * season	~site		3837	18	7711	16.18	0.00011	1
~site	~site + year + day + day2 + site * season	~site + year		3839	16	7711	16.28	0.00011	1
~season	~ day + year + site + year:site	~site + year + site * season		3839	16	7711	16.35	0.0001	1
~site + season	~site + year + day + day2	~site + year		3841	15	7712	17.1	7e-05	1
~site	~site + year + day + day2 + site * season	~site		3841	15	7712	17.11	7e-05	1
~site + season	~site + year + day + day2 + site * season	~site		3840	16	7712	17.58	5.5e-05	1
~session	~site + year + day + day2 + site * season	~year		3839	17	7713	18.34	3.8e-05	1
~session	~ day + year + site + year:site	~site + year		3838	18	7713	18.39	3.7e-05	1
~season	~ day + year + site	~site + year + site * season		3842	14	7713	18.49	3.5e-05	1
~site + season	~ day + site	~site + year + site * season		3841	15	7713	18.51	3.5e-05	1
~session	~ day + site	~site + year + site * season		3840	17	7714	19.2	2.5e-05	1
~session	~site + day + day2	~site		3842	15	7714	19.4	2.2e-05	1
~session	~site + year + day + day2 + site * season	~1		3841	16	7714	19.61	2e-05	1
~site + season	~site + year + day + day2 + site * season	~year		3842	15	7714	19.74	1.9e-05	1
~1	~ day + year + site + year:site	~site + year + site * season		3842	15	7714	20.01	1.6e-05	1
~site	~site + year + day + day2 + site * season	~1		3844	13	7715	20.21	1.5e-05	1
~session	~ day + year + site	~site		3842	15	7715	20.29	1.4e-05	1
~session	~site + day + day2	~site + year		3842	16	7715	20.76	1.1e-05	1
~site + season	~site + year + day + day2 + site * season	~1		3844	14	7715	21.06	9.7e-06	1
~1	~ day + year + site	~site + year + site * season		3845	13	7716	21.08	9.6e-06	1
~site + season	~ day + year + site + year:site	~site + year		3842	16	7716	21.27	8.7e-06	1
~site	~site + year + day + day2 + site * season	~year		3844	14	7716	21.35	8.4e-06	1
~site	~site + year + day + day2	~site + year		3844	14	7716	21.47	7.9e-06	1
~site	~site + year + day + day2	~site		3845	13	7716	21.78	6.7e-06	1
~site + season	~site + year + day + day2	~site		3844	14	7717	22.27	5.3e-06	1
~season	~site + year + day + day2 + site * season	~year		3846	13	7717	22.72	4.2e-06	1
~1	~site + year + day + day2 + site * season	~1		3848	11	7718	23.2	3.3e-06	1
~session	~ day + year + site	~year		3845	14	7718	23.23	3.3e-06	1
~session	~site + day + day2	~1		3846	13	7718	23.35	3.1e-06	1
~season	~site + year + day + day2 + site * season	~site + year		3844	15	7718	23.51	2.8e-06	1
~session	~ day + year + site + year:site	~site		3842	17	7718	23.53	2.8e-06	1
~season	~site + day + day2	~site + year + site * season		3845	14	7718	23.78	2.5e-06	1
~season	~site + year + day + day2 + site * season	~1		3847	12	7718	23.99	2.2e-06	1
~session	~ day + site	~site		3845	14	7718	24	2.2e-06	1
~site + season	~site + year + day + day2	~year		3846	13	7719	24.3	1.9e-06	1
~session	~ day + year + site	~1		3846	13	7719	24.43	1.8e-06	1
~1	~site + year + day + day2 + site * season	~year		3847	12	7719	24.45	1.8e-06	1
~session	~ day + site	~site + year		3845	15	7719	24.82	1.5e-06	1
~1	~site + year + day + day2 + site * season	~site		3847	13	7719	24.84	1.5e-06	1
~site + season	~ day + year + site	~site + year		3846	14	7719	24.97	1.4e-06	1
~site	~ day + year + site + year:site	~site + year		3845	15	7719	25	1.3e-06	1
~site	~ day + year + site + year:site	~site		3846	14	7720	25.1	1.3e-06	1
~site	~site + year + day + day2	~1		3849	11	7720	25.13	1.3e-06	1
~session	~site + day + day2	~year		3846	14	7720	25.39	1.1e-06	1
~1	~site + year + day + day2 + site * season	~site + year		3846	14	7720	25.44	1.1e-06	1
~site + season	~site + year + day + day2	~1		3848	12	7720	25.69	9.6e-07	1
~site + season	~ day + year + site + year:site	~site		3845	15	7720	25.73	9.4e-07	1
~season	~site + year + day + day2 + site * season	~site		3846	14	7720	25.89	8.7e-07	1
~site	~site + day + day2	~site + year + site * season		3845	15	7720	25.91	8.6e-07	1
~site	~site + year + day + day2	~year		3848	12	7721	26.41	6.7e-07	1
~session	~ day + year + site + year:site	~year		3844	16	7721	26.53	6.3e-07	1
~site + season	~day + day2	~site + year + site * season		3847	14	7721	26.71	5.7e-07	1
~session	~day + day2	~site + year + site * season		3845	16	7721	27.01	4.9e-07	1
~season	~ day + site	~site + year + site * season		3848	13	7722	27.68	3.5e-07	1
~session	~ day + year + site + year:site	~1		3846	15	7722	27.79	3.4e-07	1
~season	~site + year + day + day2	~year		3850	11	7722	27.95	3.1e-07	1
~session	~ day + site	~1		3849	12	7723	28.1	2.9e-07	1
~site + season	~ day + year + site + year:site	~year		3847	14	7723	28.35	2.5e-07	1
~site	~ day + year + site + year:site	~1		3850	12	7723	28.73	2.1e-07	1
~site	~ day + site	~site + year + site * season		3848	14	7723	28.78	2e-07	1
~1	~site + year + day + day2	~1		3853	9	7723	28.91	1.9e-07	1
~season	~site + year + day + day2	~1		3852	10	7724	29.29	1.6e-07	1
~season	~site + year + day + day2	~site + year		3849	13	7724	29.37	1.5e-07	1
~site + season	~ day + year + site + year:site	~1		3849	13	7724	29.39	1.5e-07	1
~site	~ day + year + site	~site		3850	12	7724	29.48	1.4e-07	1
~site	~ day + year + site	~site + year		3849	13	7724	29.49	1.4e-07	1
~site + season	~ day + year + site	~site		3849	13	7724	29.76	1.2e-07	1
~session	~ day + site	~year		3849	13	7724	29.95	1.1e-07	1
~site + season	~site + day + day2	~site		3849	13	7724	30.04	1.1e-07	1
~site	~ day + year + site + year:site	~year		3849	13	7725	30.11	1.1e-07	1
~1	~site + year + day + day2	~year		3852	10	7725	30.3	9.5e-08	1
~site + season	~ day	~site + year + site * season		3849	13	7725	30.33	9.4e-08	1
~session	~ day	~site + year + site * season		3848	15	7725	30.76	7.6e-08	1
~1	~site + year + day + day2	~site		3852	11	7726	31.1	6.4e-08	1
~season	~ day + year + site + year:site	~year		3851	12	7726	31.12	6.3e-08	1
~session	~day + day2	~site		3850	13	7726	31.26	5.9e-08	1
~site + season	~site + day + day2	~site + year		3849	14	7726	31.48	5.3e-08	1
~1	~ day + year + site + year:site	~1		3853	10	7726	31.54	5.1e-08	1
~season	~site + year + day + day2	~site		3851	12	7726	31.69	4.8e-08	1
~season	~ day + year + site + year:site	~site + year		3849	14	7726	31.92	4.3e-08	1
~1	~site + year + day + day2	~site + year		3851	12	7726	32.02	4e-08	1
~season	~ day + year + site + year:site	~1		3852	11	7727	32.1	3.9e-08	1
~site + season	~ day + year + site	~year		3851	12	7727	32.25	3.6e-08	1
~session	~day + day2	~site + year		3849	14	7727	32.44	3.3e-08	1
~1	~ day + year + site + year:site	~year		3853	11	7727	32.99	2.5e-08	1
~site	~ day + year + site	~1		3854	10	7727	33.01	2.5e-08	1
~1	~ day + year + site + year:site	~site		3852	12	7728	33.15	2.3e-08	1
~site + season	~ day + year + site	~1		3853	11	7728	33.36	2.1e-08	1
~site + season	~site + day + day2	~1		3853	11	7728	33.74	1.7e-08	1
~1	~site + day + day2	~site + year + site * season		3851	13	7728	33.75	1.7e-08	1
~site + season	~ day + site	~site		3852	12	7728	33.94	1.6e-08	1
~season	~ day + year + site + year:site	~site		3851	13	7728	33.99	1.5e-08	1
~1	~ day + year + site + year:site	~site + year		3851	13	7728	34.01	1.5e-08	1
~site	~ day + year + site	~year		3853	11	7729	34.47	1.2e-08	1
~site + season	~ day + site	~site + year		3852	13	7729	34.96	9.3e-09	1
~session	~ day	~site		3853	12	7730	35.49	7.1e-09	1
~season	~ day + year + site	~year		3855	10	7730	35.67	6.5e-09	1
~site + season	~site + day + day2	~year		3853	12	7730	35.74	6.3e-09	1
~session	~ day	~site + year		3852	13	7731	36.22	5e-09	1
~1	~ day + year + site	~1		3858	8	7731	36.59	4.1e-09	1
~1	~ day + site	~site + year + site * season		3854	12	7731	36.7	3.9e-09	1
~season	~ day + year + site	~1		3857	9	7731	36.72	3.8e-09	1
~season	~ day + year + site	~site + year		3854	12	7731	37.02	3.3e-09	1
~season	~site + day + day2	~1		3857	9	7732	37.66	2.4e-09	1
~site + season	~ day + site	~1		3856	10	7732	37.71	2.3e-09	1
~1	~ day + year + site	~year		3857	9	7733	38.15	1.9e-09	1
~session	~day + day2	~1		3855	11	7733	38.35	1.7e-09	1
~1	~ day + year + site	~site		3857	10	7733	38.72	1.4e-09	1
~season	~ day + year + site	~site		3856	11	7734	39.09	1.2e-09	1
~site	~day + day2	~site + year + site * season		3854	13	7734	39.13	1.2e-09	1
~site + season	~ day + site	~year		3856	11	7734	39.63	9e-10	1
~season	~site + day + day2	~year		3857	10	7734	39.66	8.9e-10	1
~1	~ day + year + site	~site + year		3856	11	7734	39.85	8.1e-10	1
~session	~day + day2	~year		3855	12	7735	40.19	6.8e-10	1
~season	~day + day2	~site + year + site * season		3855	12	7735	40.31	6.4e-10	1
~season	~site + day + day2	~site		3856	11	7735	40.56	5.7e-10	1
~season	~ day + site	~1		3860	8	7736	41.33	3.8e-10	1
~site	~ day	~site + year + site * season		3856	12	7736	41.6	3.4e-10	1
~session	~ day	~1		3858	10	7737	42.45	2.2e-10	1
~site + season	~day + day2	~site		3857	11	7737	42.5	2.1e-10	1
~season	~site + day + day2	~site + year		3856	12	7737	42.55	2.1e-10	1
~season	~ day + site	~year		3860	9	7738	43.28	1.5e-10	1
~site + season	~day + day2	~site + year		3857	12	7738	43.63	1.2e-10	1
~season	~ day	~site + year + site * season		3858	11	7738	43.88	1.1e-10	1
~session	~ day	~year		3858	11	7739	44.08	9.7e-11	1
~season	~ day + site	~site		3859	10	7739	44.12	9.5e-11	1
~site	~site + day + day2	~site + year		3857	13	7739	44.98	6.2e-11	1
~site	~site + day + day2	~year		3859	11	7740	45.14	5.7e-11	1
~season	~ day + site	~site + year		3859	11	7740	46	3.7e-11	1
~site + season	~site + year + site * season	~site + year + site * season		3853	17	7741	46.16	3.4e-11	1
~site + season	~ day	~site		3860	10	7741	46.26	3.3e-11	1
~site + season	~ day	~site + year		3860	11	7741	46.95	2.3e-11	1
~site	~ day + site	~site + year		3859	12	7742	47.34	1.9e-11	1
~session	~site + year + site * season	~site + year + site * season		3852	19	7742	47.9	1.4e-11	1
~site	~ day + site	~year		3861	10	7742	47.95	1.4e-11	1
~site + season	~site + year	~site + year + site * season		3857	15	7743	49.01	8.3e-12	1
~site + season	~day + day2	~1		3863	9	7743	49.05	8.1e-12	1
~1	~site + day + day2	~year		3863	9	7744	49.13	7.8e-12	1
~site	~site + year + site * season	~site + year + site * season		3856	16	7744	49.3	7.1e-12	1
~1	~day + day2	~site + year + site * season		3861	11	7744	49.69	5.9e-12	1
~session	~site + year	~site + year + site * season		3855	17	7744	49.99	5.1e-12	1
~site + season	~day + day2	~year		3863	10	7745	50.91	3.2e-12	1
~1	~ day + site	~year		3865	8	7746	51.74	2.1e-12	1
~1	~ day	~site + year + site * season		3863	10	7747	52.29	1.6e-12	1
~1	~site + day + day2	~site + year		3862	11	7747	52.35	1.6e-12	1
~site	~site + year	~site + year + site * season		3860	14	7747	52.58	1.4e-12	1
~site + season	~ day	~1		3866	8	7747	52.58	1.4e-12	1
~site + season	~site	~site + year + site * season		3860	14	7747	53.03	1.1e-12	1
~session	~site	~site + year + site * season		3858	16	7748	53.53	8.6e-13	1
~site + season	~ day	~year		3865	9	7749	54.23	6.1e-13	1
~session	~site + year	~site + year		3859	15	7749	54.26	6e-13	1
~1	~ day + site	~site + year		3865	10	7749	54.9	4.3e-13	1
~season	~site + year + site * season	~site + year + site * season		3860	15	7750	55.98	2.5e-13	1
~session	~site + year + site * season	~site + year		3859	17	7752	57.35	1.3e-13	1
~season	~day + day2	~site		3867	9	7752	57.97	9.4e-14	1
~session	~site	~site		3863	13	7753	58.14	8.6e-14	1
~session	~site + year	~site		3862	14	7753	58.14	8.6e-14	1
~session	~site	~site + year		3862	14	7753	58.24	8.2e-14	1
~site	~day + day2	~site + year		3865	11	7753	58.4	7.5e-14	1
~season	~site + year	~site + year + site * season		3864	13	7753	58.77	6.3e-14	1
~season	~day + day2	~site + year		3867	10	7754	59.96	3.5e-14	1
~site + season	~site + year + site * season	~site + year		3862	15	7754	60.07	3.3e-14	1
~1	~site + year + site * season	~site + year + site * season		3863	14	7755	60.1	3.2e-14	1
~site	~ day	~site + year		3867	10	7755	60.49	2.7e-14	1
~season	~ day	~site		3870	8	7756	61.23	1.8e-14	1
~session	~site + year	~year		3865	13	7756	61.39	1.7e-14	1
~session	~site + year + site * season	~site		3862	16	7756	61.42	1.7e-14	1
~1	~site + year	~site + year + site * season		3866	12	7756	61.74	1.4e-14	1
~session	~site	~1		3867	11	7756	61.98	1.3e-14	1
~session	~site + year	~1		3866	12	7756	61.98	1.3e-14	1
~site	~site	~site + year + site * season		3865	13	7757	62.14	1.2e-14	1
~season	~site	~site + year + site * season		3866	12	7757	62.48	9.8e-15	1
~site	~day + day2	~year		3869	9	7757	62.49	9.8e-15	1
~site + season	~site + year	~site + year		3866	13	7758	63.14	7.1e-15	1
~season	~ day	~site + year		3870	9	7758	63.2	6.8e-15	1
~session	~site	~year		3867	12	7758	63.5	5.9e-15	1
~site + season	~site + year + site * season	~site		3865	14	7758	63.54	5.8e-15	1
~site	~site + year + site * season	~site		3866	13	7758	63.6	5.6e-15	1
~site + season	~year	~site + year + site * season		3866	13	7758	63.91	4.8e-15	1
~site	~site + year + site * season	~site + year		3865	14	7759	64.24	4.1e-15	1
~session	~year	~site + year + site * season		3864	15	7759	64.51	3.6e-15	1
~site	~ day + site	~site		3868	11	7759	64.57	3.4e-15	1
~site	~ day	~year		3872	8	7759	64.67	3.3e-15	1
~session	~site + year + site * season	~year		3865	15	7759	64.73	3.2e-15	1
~session	~site + year + site * season	~1		3866	14	7760	65.37	2.3e-15	1
~site + season	~b	~site + year + site * season		3868	12	7760	65.59	2.1e-15	1
~session	~b	~site + year + site * season		3866	14	7760	65.82	1.8e-15	1
~site	~site + day + day2	~site		3868	12	7760	66.01	1.7e-15	1
~site + season	~site + year + site * season	~year		3867	13	7761	66.54	1.3e-15	1
~site + season	~site + year	~site		3869	12	7761	66.83	1.1e-15	1
~site	~site + year + site * season	~1		3870	11	7761	66.99	1e-15	1
~site + season	~site + year + site * season	~1		3869	12	7761	66.99	1e-15	1
~site + season	~site	~site		3870	11	7762	67.3	8.8e-16	1
~site	~site + year	~site		3870	11	7762	67.35	8.6e-16	1
~site + season	~site	~site + year		3869	12	7762	67.74	7.1e-16	1
~site	~site + year	~site + year		3869	12	7763	68.13	5.8e-16	1
~site	~ day + site	~1		3872	9	7763	68.36	5.2e-16	1
~1	~day + day2	~site + year		3872	9	7763	68.54	4.8e-16	1
~session	~year	~site + year		3868	13	7763	68.56	4.7e-16	1
~site	~site + year + site * season	~year		3870	12	7763	68.71	4.4e-16	1
~site	~year	~site + year + site * season		3870	12	7763	68.98	3.8e-16	1
~site + season	~site + year	~year		3871	11	7764	69.72	2.6e-16	1
~site	~site + day + day2	~1		3872	10	7764	69.77	2.6e-16	1
~season	~site + year + site * season	~year		3871	11	7764	69.8	2.5e-16	1
~season	~site + year + site * season	~1		3872	10	7765	70.18	2.1e-16	1
~site + season	~site + year	~1		3872	10	7765	70.21	2.1e-16	1
~session	~b	~site		3871	11	7765	70.22	2e-16	1
~1	~site	~site + year + site * season		3871	11	7765	70.22	2e-16	1
~session	~b	~site + year		3870	12	7765	70.29	2e-16	1
~1	~site + year + site * season	~1		3873	9	7765	70.3	2e-16	1
~site	~site + year	~1		3874	9	7765	70.62	1.7e-16	1
~season	~site + year + site * season	~site + year		3870	13	7765	70.8	1.5e-16	1
~site + season	~site	~1		3874	9	7765	70.81	1.5e-16	1
~1	~ day	~site + year		3875	8	7765	70.87	1.5e-16	1
~session	~year	~site		3871	12	7766	71.27	1.2e-16	1
~1	~site + year + site * season	~site		3872	11	7766	71.86	9e-17	1
~1	~site + year + site * season	~year		3873	10	7767	72.08	8.1e-17	1
~season	~site + year + site * season	~site		3871	12	7767	72.09	8e-17	1
~site	~site + year	~year		3873	10	7767	72.42	6.8e-17	1
~site + season	~site	~year		3873	10	7767	72.5	6.6e-17	1
~1	~site + year + site * season	~site + year		3872	12	7768	73.25	4.5e-17	1
~1	~ day + site	~1		3877	7	7768	73.34	4.3e-17	1
~season	~site + year	~year		3875	9	7768	73.6	3.8e-17	1
~season	~site + year	~1		3876	8	7768	74.01	3.1e-17	1
~1	~site + year	~1		3878	7	7769	74.61	2.3e-17	1
~season	~site	~1		3878	7	7769	74.76	2.1e-17	1
~1	~site + day + day2	~1		3877	8	7769	74.86	2e-17	1
~season	~site + year	~site + year		3874	11	7770	75.18	1.7e-17	1
~site	~b	~site + year + site * season		3874	11	7770	75.63	1.4e-17	1
~session	~b	~1		3876	9	7770	75.79	1.3e-17	1
~1	~ day + site	~site		3876	9	7770	75.97	1.2e-17	1
~season	~site + year	~site		3875	10	7771	76.42	9.2e-18	1
~session	~year	~year		3874	11	7771	76.43	9.2e-18	1
~1	~site + year	~year		3877	8	7771	76.45	9.1e-18	1
~season	~site	~year		3877	8	7771	76.5	8.8e-18	1
~1	~site + year	~site		3877	9	7771	76.73	7.9e-18	1
~session	~year	~1		3876	10	7771	76.94	7.1e-18	1
~session	~b	~year		3876	10	7771	76.96	7e-18	1
~season	~site	~site		3877	9	7772	77.45	5.5e-18	1
~1	~site + day + day2	~site		3876	10	7772	77.53	5.3e-18	1
~site	~ day	~site		3877	9	7772	77.66	5e-18	1
~1	~site + year	~site + year		3876	10	7773	78.32	3.6e-18	1
~season	~year	~site + year + site * season		3875	11	7773	78.47	3.3e-18	1
~site	~site	~site + year		3876	11	7773	78.89	2.7e-18	1
~season	~site	~site + year		3877	10	7773	79.06	2.5e-18	1
~site	~day + day2	~site		3877	10	7774	79.13	2.4e-18	1
~site + season	~year	~site + year		3876	11	7774	79.18	2.3e-18	1
~season	~day + day2	~1		3880	7	7774	79.68	1.8e-18	1
~site	~site	~year		3878	9	7774	79.81	1.7e-18	1
~season	~b	~site + year + site * season		3877	10	7774	79.94	1.6e-18	1
~site + season	~b	~site		3878	9	7775	80.52	1.2e-18	1
~site + season	~b	~site + year		3878	10	7775	80.58	1.2e-18	1
~season	~day + day2	~year		3880	8	7776	81.55	7.1e-19	1
~site + season	~year	~site		3878	10	7776	81.68	6.7e-19	1
~1	~year	~site + year + site * season		3878	10	7776	81.77	6.4e-19	1
~season	~ day	~1		3882	6	7776	81.94	5.8e-19	1
~season	~ day	~year		3882	7	7778	83.66	2.5e-19	1
~1	~site	~year		3882	7	7778	83.86	2.2e-19	1
~site	~year	~site		3880	9	7779	84.33	1.8e-19	1
~site	~ day	~1		3882	7	7779	84.45	1.7e-19	1
~site + season	~b	~1		3883	7	7780	85.56	9.6e-20	1
~site	~day + day2	~1		3882	8	7780	86	7.7e-20	1
~site	~year	~site + year		3880	10	7780	86.05	7.5e-20	1
~site + season	~year	~year		3881	9	7781	86.18	7e-20	1
~site + season	~year	~1		3883	8	7781	86.68	5.5e-20	1
~site + season	~b	~year		3883	8	7781	86.75	5.3e-20	1
~1	~site	~site + year		3882	9	7781	86.86	5e-20	1
~1	~b	~site + year + site * season		3882	9	7782	87.08	4.5e-20	1
~site	~year	~1		3885	7	7784	89.4	1.4e-20	1
~site	~site	~site		3882	10	7784	90.04	1e-20	1
~site	~year	~year		3885	8	7786	91.39	5.2e-21	1
~1	~day + day2	~year		3886	7	7787	92.4	3.1e-21	1
~site	~b	~site + year		3885	9	7787	92.69	2.7e-21	1
~1	~ day	~site		3887	7	7788	93.25	2e-21	1
~1	~ day	~year		3888	6	7788	93.47	1.8e-21	1
~site	~site	~1		3886	8	7788	93.57	1.7e-21	1
~1	~day + day2	~site		3887	8	7789	94.88	9e-22	1
~season	~b	~site		3888	7	7790	95.96	5.3e-22	1
~site	~b	~year		3888	7	7791	96.19	4.7e-22	1
~season	~year	~site		3887	8	7791	96.47	4.1e-22	1
~season	~year	~site + year		3887	9	7792	97.09	3e-22	1
~season	~b	~site + year		3888	8	7792	97.8	2.1e-22	1
~1	~year	~site		3889	7	7793	98.2	1.7e-22	1
~1	~site	~1		3890	6	7793	98.38	1.6e-22	1
~1	~year	~site + year		3889	8	7795	100.18	6.4e-23	1
~1	~site	~site		3890	8	7795	100.93	4.4e-23	1
~site	~b	~site		3891	8	7798	103.72	1.1e-23	1
~1	~b	~site + year		3892	7	7799	104.22	8.5e-24	1
~site	~b	~1		3896	6	7804	109.14	7.2e-25	1
~1	~ day	~1		3899	5	7807	113.06	1e-25	1
~1	~day + day2	~1		3899	6	7809	114.92	4e-26	1
~season	~b	~1		3901	5	7813	118.2	7.8e-27	1
~season	~year	~year		3900	7	7813	118.77	5.9e-27	1
~season	~year	~1		3901	6	7814	119.23	4.7e-27	1
~1	~b	~site		3901	6	7814	119.41	4.3e-27	1
~season	~b	~year		3901	6	7814	119.45	4.2e-27	1
~1	~year	~1		3903	5	7816	121.59	1.4e-27	1
~1	~year	~year		3903	6	7818	123.57	5.3e-28	1
~1	~b	~year		3906	5	7823	128.41	4.7e-29	1
~1	~b	~1		3914	4	7835	140.99	8.8e-32	1

## Sheet: Sheet2
logL	K	AIC	dAIC	weight	CumWt
3828	19	7694	0	0.36	0.36
3830	17	7695	0.54	0.28	0.64
3830	18	7697	2.51	0.1	0.74
3830	19	7697	2.62	0.098	0.84
3833	16	7698	3.37	0.067	0.91
3828	21	7699	4.31	0.042	0.95
3833	18	7701	6.83	0.012	0.96
3834	17	7701	6.97	0.011	0.97
3832	20	7703	8.73	0.0046	0.98
3835	17	7703	8.9	0.0042	0.98
3836	16	7703	8.94	0.0042	0.99
3835	17	7704	9.5	0.0031	0.99
3834	18	7705	10.26	0.0021	0.99
3837	15	7705	10.28	0.0021	0.99
3834	19	7706	11.27	0.0013	0.99
3838	15	7706	11.93	0.00093	1
3837	16	7707	12.18	0.00082	1
3837	16	7707	12.22	0.00081	1
3840	14	7707	12.67	0.00064	1
3837	17	7707	12.74	0.00062	1
3839	15	7709	14.56	0.00025	1
3838	16	7709	14.56	0.00025	1
3839	16	7710	15.33	0.00017	1
3837	18	7710	15.48	0.00016	1
3841	14	7710	16.07	0.00012	1
3837	18	7711	16.18	0.00011	1
3839	16	7711	16.28	0.00011	1
3839	16	7711	16.35	0.0001	1
3841	15	7712	17.1	7e-05	1
3841	15	7712	17.11	7e-05	1
3840	16	7712	17.58	5.5e-05	1
3839	17	7713	18.34	3.8e-05	1
3838	18	7713	18.39	3.7e-05	1
3842	14	7713	18.49	3.5e-05	1
3841	15	7713	18.51	3.5e-05	1
3840	17	7714	19.2	2.5e-05	1
3842	15	7714	19.4	2.2e-05	1
3841	16	7714	19.61	2e-05	1
3842	15	7714	19.74	1.9e-05	1
3842	15	7714	20.01	1.6e-05	1
3844	13	7715	20.21	1.5e-05	1
3842	15	7715	20.29	1.4e-05	1
3842	16	7715	20.76	1.1e-05	1
3844	14	7715	21.06	9.7e-06	1
3845	13	7716	21.08	9.6e-06	1
3842	16	7716	21.27	8.7e-06	1
3844	14	7716	21.35	8.4e-06	1
3844	14	7716	21.47	7.9e-06	1
3845	13	7716	21.78	6.7e-06	1
3844	14	7717	22.27	5.3e-06	1
3846	13	7717	22.72	4.2e-06	1
3848	11	7718	23.2	3.3e-06	1
3845	14	7718	23.23	3.3e-06	1
3846	13	7718	23.35	3.1e-06	1
3844	15	7718	23.51	2.8e-06	1
3842	17	7718	23.53	2.8e-06	1
3845	14	7718	23.78	2.5e-06	1
3847	12	7718	23.99	2.2e-06	1
3845	14	7718	24	2.2e-06	1
3846	13	7719	24.3	1.9e-06	1
3846	13	7719	24.43	1.8e-06	1
3847	12	7719	24.45	1.8e-06	1
3845	15	7719	24.82	1.5e-06	1
3847	13	7719	24.84	1.5e-06	1
3846	14	7719	24.97	1.4e-06	1
3845	15	7719	25	1.3e-06	1
3846	14	7720	25.1	1.3e-06	1
3849	11	7720	25.13	1.3e-06	1
3846	14	7720	25.39	1.1e-06	1
3846	14	7720	25.44	1.1e-06	1
3848	12	7720	25.69	9.6e-07	1
3845	15	7720	25.73	9.4e-07	1
3846	14	7720	25.89	8.7e-07	1
3845	15	7720	25.91	8.6e-07	1
3848	12	7721	26.41	6.7e-07	1
3844	16	7721	26.53	6.3e-07	1
3847	14	7721	26.71	5.7e-07	1
3845	16	7721	27.01	4.9e-07	1
3848	13	7722	27.68	3.5e-07	1
3846	15	7722	27.79	3.4e-07	1
3850	11	7722	27.95	3.1e-07	1
3849	12	7723	28.1	2.9e-07	1
3847	14	7723	28.35	2.5e-07	1
3850	12	7723	28.73	2.1e-07	1
3848	14	7723	28.78	2e-07	1
3853	9	7723	28.91	1.9e-07	1
3852	10	7724	29.29	1.6e-07	1
3849	13	7724	29.37	1.5e-07	1
3849	13	7724	29.39	1.5e-07	1
3850	12	7724	29.48	1.4e-07	1
3849	13	7724	29.49	1.4e-07	1
3849	13	7724	29.76	1.2e-07	1
3849	13	7724	29.95	1.1e-07	1
3849	13	7724	30.04	1.1e-07	1
3849	13	7725	30.11	1.1e-07	1
3852	10	7725	30.3	9.5e-08	1
3849	13	7725	30.33	9.4e-08	1
3848	15	7725	30.76	7.6e-08	1
3852	11	7726	31.1	6.4e-08	1
3851	12	7726	31.12	6.3e-08	1
3850	13	7726	31.26	5.9e-08	1
3849	14	7726	31.48	5.3e-08	1
3853	10	7726	31.54	5.1e-08	1
3851	12	7726	31.69	4.8e-08	1
3849	14	7726	31.92	4.3e-08	1
3851	12	7726	32.02	4e-08	1
3852	11	7727	32.1	3.9e-08	1
3851	12	7727	32.25	3.6e-08	1
3849	14	7727	32.44	3.3e-08	1
3853	11	7727	32.99	2.5e-08	1
3854	10	7727	33.01	2.5e-08	1
3852	12	7728	33.15	2.3e-08	1
3853	11	7728	33.36	2.1e-08	1
3853	11	7728	33.74	1.7e-08	1
3851	13	7728	33.75	1.7e-08	1
3852	12	7728	33.94	1.6e-08	1
3851	13	7728	33.99	1.5e-08	1
3851	13	7728	34.01	1.5e-08	1
3853	11	7729	34.47	1.2e-08	1
3852	13	7729	34.96	9.3e-09	1
3853	12	7730	35.49	7.1e-09	1
3855	10	7730	35.67	6.5e-09	1
3853	12	7730	35.74	6.3e-09	1
3852	13	7731	36.22	5e-09	1
3858	8	7731	36.59	4.1e-09	1
3854	12	7731	36.7	3.9e-09	1
3857	9	7731	36.72	3.8e-09	1
3854	12	7731	37.02	3.3e-09	1
3857	9	7732	37.66	2.4e-09	1
3856	10	7732	37.71	2.3e-09	1
3857	9	7733	38.15	1.9e-09	1
3855	11	7733	38.35	1.7e-09	1
3857	10	7733	38.72	1.4e-09	1
3856	11	7734	39.09	1.2e-09	1
3854	13	7734	39.13	1.2e-09	1
3856	11	7734	39.63	9e-10	1
3857	10	7734	39.66	8.9e-10	1
3856	11	7734	39.85	8.1e-10	1
3855	12	7735	40.19	6.8e-10	1
3855	12	7735	40.31	6.4e-10	1
3856	11	7735	40.56	5.7e-10	1
3860	8	7736	41.33	3.8e-10	1
3856	12	7736	41.6	3.4e-10	1
3858	10	7737	42.45	2.2e-10	1
3857	11	7737	42.5	2.1e-10	1
3856	12	7737	42.55	2.1e-10	1
3860	9	7738	43.28	1.5e-10	1
3857	12	7738	43.63	1.2e-10	1
3858	11	7738	43.88	1.1e-10	1
3858	11	7739	44.08	9.7e-11	1
3859	10	7739	44.12	9.5e-11	1
3857	13	7739	44.98	6.2e-11	1
3859	11	7740	45.14	5.7e-11	1
3859	11	7740	46	3.7e-11	1
3853	17	7741	46.16	3.4e-11	1
3860	10	7741	46.26	3.3e-11	1
3860	11	7741	46.95	2.3e-11	1
3859	12	7742	47.34	1.9e-11	1
3852	19	7742	47.9	1.4e-11	1
3861	10	7742	47.95	1.4e-11	1
3857	15	7743	49.01	8.3e-12	1
3863	9	7743	49.05	8.1e-12	1
3863	9	7744	49.13	7.8e-12	1
3856	16	7744	49.3	7.1e-12	1
3861	11	7744	49.69	5.9e-12	1
3855	17	7744	49.99	5.1e-12	1
3863	10	7745	50.91	3.2e-12	1
3865	8	7746	51.74	2.1e-12	1
3863	10	7747	52.29	1.6e-12	1
3862	11	7747	52.35	1.6e-12	1
3860	14	7747	52.58	1.4e-12	1
3866	8	7747	52.58	1.4e-12	1
3860	14	7747	53.03	1.1e-12	1
3858	16	7748	53.53	8.6e-13	1
3865	9	7749	54.23	6.1e-13	1
3859	15	7749	54.26	6e-13	1
3865	10	7749	54.9	4.3e-13	1
3860	15	7750	55.98	2.5e-13	1
3859	17	7752	57.35	1.3e-13	1
3867	9	7752	57.97	9.4e-14	1
3863	13	7753	58.14	8.6e-14	1
3862	14	7753	58.14	8.6e-14	1
3862	14	7753	58.24	8.2e-14	1
3865	11	7753	58.4	7.5e-14	1
3864	13	7753	58.77	6.3e-14	1
3867	10	7754	59.96	3.5e-14	1
3862	15	7754	60.07	3.3e-14	1
3863	14	7755	60.1	3.2e-14	1
3867	10	7755	60.49	2.7e-14	1
3870	8	7756	61.23	1.8e-14	1
3865	13	7756	61.39	1.7e-14	1
3862	16	7756	61.42	1.7e-14	1
3866	12	7756	61.74	1.4e-14	1
3867	11	7756	61.98	1.3e-14	1
3866	12	7756	61.98	1.3e-14	1
3865	13	7757	62.14	1.2e-14	1
3866	12	7757	62.48	9.8e-15	1
3869	9	7757	62.49	9.8e-15	1
3866	13	7758	63.14	7.1e-15	1
3870	9	7758	63.2	6.8e-15	1
3867	12	7758	63.5	5.9e-15	1
3865	14	7758	63.54	5.8e-15	1
3866	13	7758	63.6	5.6e-15	1
3866	13	7758	63.91	4.8e-15	1
3865	14	7759	64.24	4.1e-15	1
3864	15	7759	64.51	3.6e-15	1
3868	11	7759	64.57	3.4e-15	1
3872	8	7759	64.67	3.3e-15	1
3865	15	7759	64.73	3.2e-15	1
3866	14	7760	65.37	2.3e-15	1
3868	12	7760	65.59	2.1e-15	1
3866	14	7760	65.82	1.8e-15	1
3868	12	7760	66.01	1.7e-15	1
3867	13	7761	66.54	1.3e-15	1
3869	12	7761	66.83	1.1e-15	1
3870	11	7761	66.99	1e-15	1
3869	12	7761	66.99	1e-15	1
3870	11	7762	67.3	8.8e-16	1
3870	11	7762	67.35	8.6e-16	1
3869	12	7762	67.74	7.1e-16	1
3869	12	7763	68.13	5.8e-16	1
3872	9	7763	68.36	5.2e-16	1
3872	9	7763	68.54	4.8e-16	1
3868	13	7763	68.56	4.7e-16	1
3870	12	7763	68.71	4.4e-16	1
3870	12	7763	68.98	3.8e-16	1
3871	11	7764	69.72	2.6e-16	1
3872	10	7764	69.77	2.6e-16	1
3871	11	7764	69.8	2.5e-16	1
3872	10	7765	70.18	2.1e-16	1
3872	10	7765	70.21	2.1e-16	1
3871	11	7765	70.22	2e-16	1
3871	11	7765	70.22	2e-16	1
3870	12	7765	70.29	2e-16	1
3873	9	7765	70.3	2e-16	1
3874	9	7765	70.62	1.7e-16	1
3870	13	7765	70.8	1.5e-16	1
3874	9	7765	70.81	1.5e-16	1
3875	8	7765	70.87	1.5e-16	1
3871	12	7766	71.27	1.2e-16	1
3872	11	7766	71.86	9e-17	1
3873	10	7767	72.08	8.1e-17	1
3871	12	7767	72.09	8e-17	1
3873	10	7767	72.42	6.8e-17	1
3873	10	7767	72.5	6.6e-17	1
3872	12	7768	73.25	4.5e-17	1
3877	7	7768	73.34	4.3e-17	1
3875	9	7768	73.6	3.8e-17	1
3876	8	7768	74.01	3.1e-17	1
3878	7	7769	74.61	2.3e-17	1
3878	7	7769	74.76	2.1e-17	1
3877	8	7769	74.86	2e-17	1
3874	11	7770	75.18	1.7e-17	1
3874	11	7770	75.63	1.4e-17	1
3876	9	7770	75.79	1.3e-17	1
3876	9	7770	75.97	1.2e-17	1
3875	10	7771	76.42	9.2e-18	1
3874	11	7771	76.43	9.2e-18	1
3877	8	7771	76.45	9.1e-18	1
3877	8	7771	76.5	8.8e-18	1
3877	9	7771	76.73	7.9e-18	1
3876	10	7771	76.94	7.1e-18	1
3876	10	7771	76.96	7e-18	1
3877	9	7772	77.45	5.5e-18	1
3876	10	7772	77.53	5.3e-18	1
3877	9	7772	77.66	5e-18	1
3876	10	7773	78.32	3.6e-18	1
3875	11	7773	78.47	3.3e-18	1
3876	11	7773	78.89	2.7e-18	1
3877	10	7773	79.06	2.5e-18	1
3877	10	7774	79.13	2.4e-18	1
3876	11	7774	79.18	2.3e-18	1
3880	7	7774	79.68	1.8e-18	1
3878	9	7774	79.81	1.7e-18	1
3877	10	7774	79.94	1.6e-18	1
3878	9	7775	80.52	1.2e-18	1
3878	10	7775	80.58	1.2e-18	1
3880	8	7776	81.55	7.1e-19	1
3878	10	7776	81.68	6.7e-19	1
3878	10	7776	81.77	6.4e-19	1
3882	6	7776	81.94	5.8e-19	1
3882	7	7778	83.66	2.5e-19	1
3882	7	7778	83.86	2.2e-19	1
3880	9	7779	84.33	1.8e-19	1
3882	7	7779	84.45	1.7e-19	1
3883	7	7780	85.56	9.6e-20	1
3882	8	7780	86	7.7e-20	1
3880	10	7780	86.05	7.5e-20	1
3881	9	7781	86.18	7e-20	1
3883	8	7781	86.68	5.5e-20	1
3883	8	7781	86.75	5.3e-20	1
3882	9	7781	86.86	5e-20	1
3882	9	7782	87.08	4.5e-20	1
3885	7	7784	89.4	1.4e-20	1
3882	10	7784	90.04	1e-20	1
3885	8	7786	91.39	5.2e-21	1
3886	7	7787	92.4	3.1e-21	1
3885	9	7787	92.69	2.7e-21	1
3887	7	7788	93.25	2e-21	1
3888	6	7788	93.47	1.8e-21	1
3886	8	7788	93.57	1.7e-21	1
3887	8	7789	94.88	9e-22	1
3888	7	7790	95.96	5.3e-22	1
3888	7	7791	96.19	4.7e-22	1
3887	8	7791	96.47	4.1e-22	1
3887	9	7792	97.09	3e-22	1
3888	8	7792	97.8	2.1e-22	1
3889	7	7793	98.2	1.7e-22	1
3890	6	7793	98.38	1.6e-22	1
3889	8	7795	100.18	6.4e-23	1
3890	8	7795	100.93	4.4e-23	1
3891	8	7798	103.72	1.1e-23	1
3892	7	7799	104.22	8.5e-24	1
3896	6	7804	109.14	7.2e-25	1
3899	5	7807	113.06	1e-25	1
3899	6	7809	114.92	4e-26	1
3901	5	7813	118.2	7.8e-27	1
3900	7	7813	118.77	5.9e-27	1
3901	6	7814	119.23	4.7e-27	1
3901	6	7814	119.41	4.3e-27	1
3901	6	7814	119.45	4.2e-27	1
3903	5	7816	121.59	1.4e-27	1
3903	6	7818	123.57	5.3e-28	1
3906	5	7823	128.41	4.7e-29	1
3914	4	7835	140.99	8.8e-32	1
